# Supplementary material for: E. coli Fis Protein Insulates the cbpA Gene from Uncontrolled Transcription
Source: PLOS journal article supplement (doi:10.1371/journal.pgen.1003152), 2013-01-17
Supplement: S1 (10.1371/journal.pgen.1003152.s001) [file journal.pgen.1003152.s001]

A

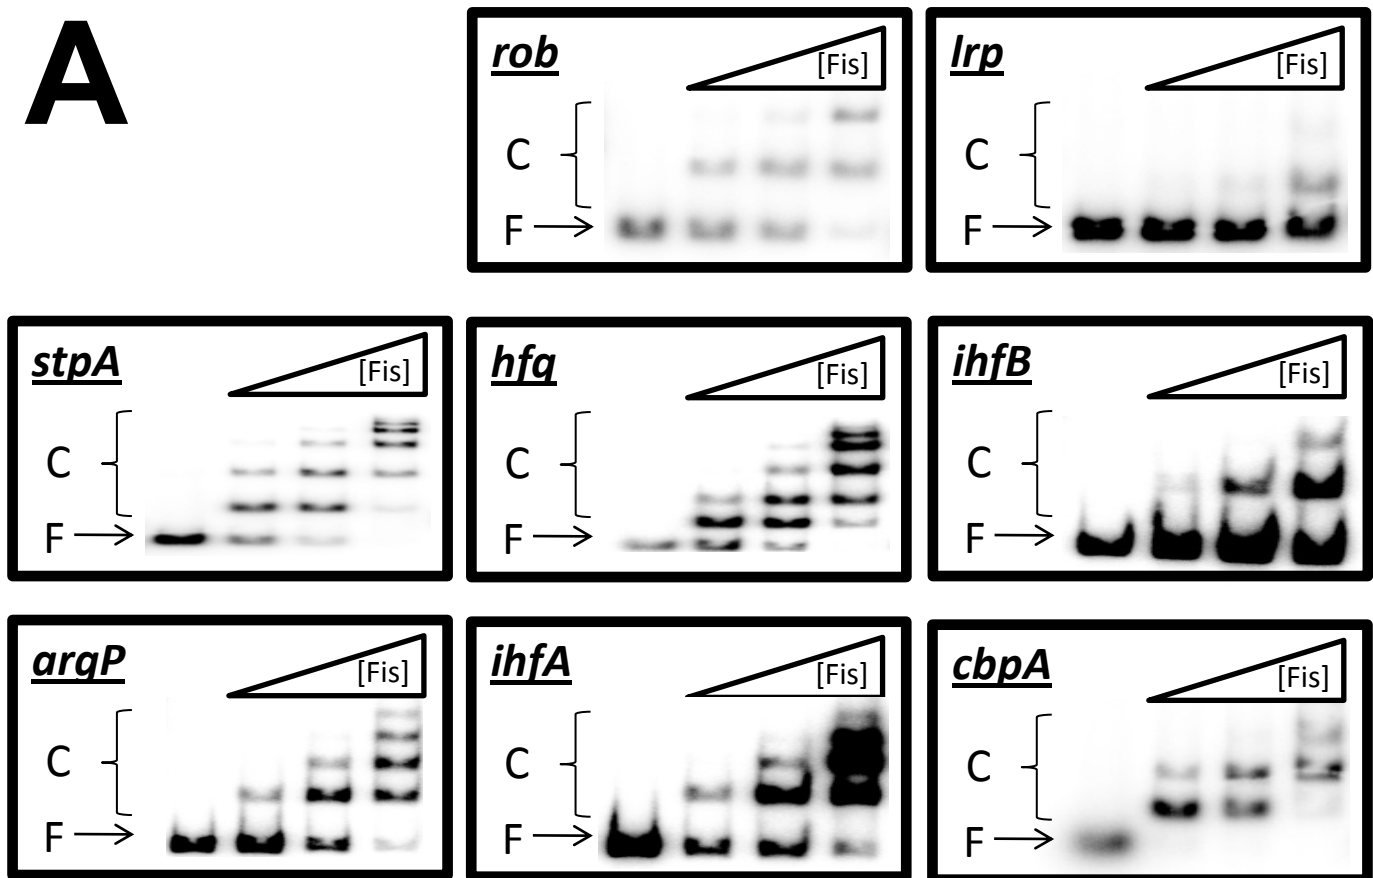

B

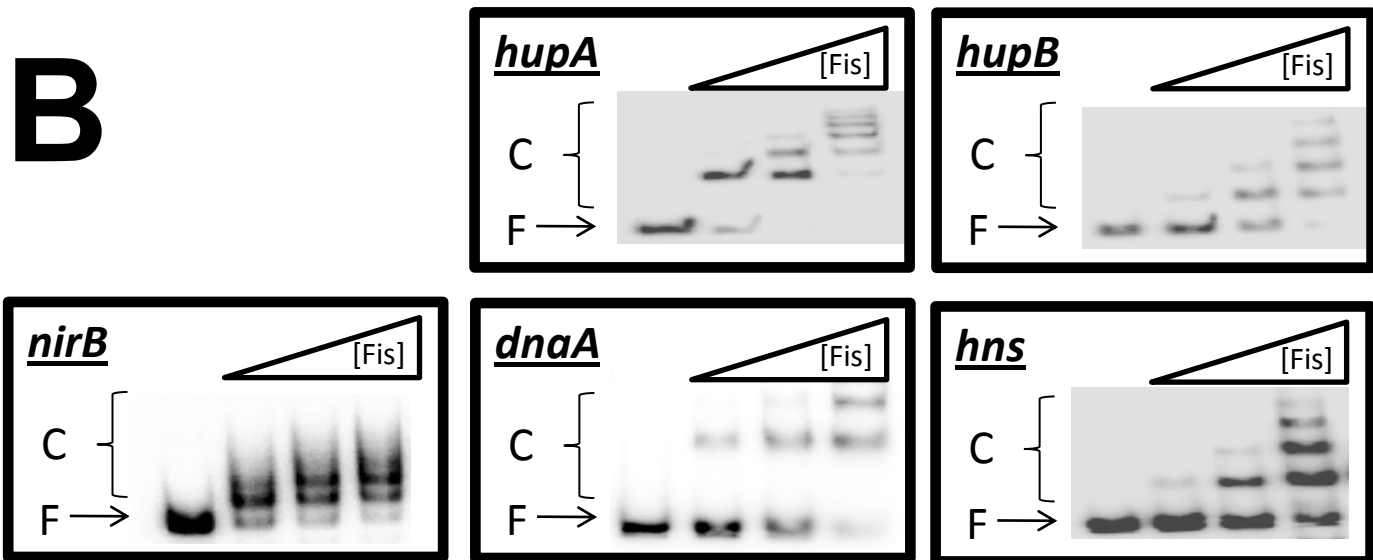

**Figure S1: Binding of Fis to DNA fragments carrying regulatory DNA sequences for genes encoding different nucleoid proteins.** 175 nM, 350 nM or 700 nM Fis was incubated with different radiolabelled DNA fragments and the resulting protein-DNA complexes were separated by PAGE. Free DNA (F) and Fis-DNA complexes (C) are indicated. Promoters not known to contain Fis sites are shown in part A and panel B shows data for promoters with previously identified Fis binding sites. The *nirB* DNA fragment was included as a positive control.
